# Supplementary material
Source: PubMed Central journal article supplement (PMC6667183)
Supplement: NIHMS1040457-supplement-Supplemental_Material.pdf [file NIHMS1040457-supplement-Supplemental_Material.pdf]

## **Item S1: Details about the case, methods, and model development.**

### *Details about the Case:*

- Kidney function was grossly estimated as an eGFR of 10 mL/min. Indeed, hemodialysis and amyotrophy precluded the formal application of the MDRD Study equation.
- Kidney biopsy showed amyloidosis with 25% fibrosis, 13% glomerulosclerosis, light chains tubular deposition and epithelial tubular lesions.
- Hepatic function was unremarkable.
- As multiple myeloma had been refractory to combined thalidomide, bortezomib and dexamethasone therapy, pomalidomide p.o. was introduced along with the fourth cycle of bortezomib and dexamethasone, while thalidomide was discontinued.
- No drugs affecting cytochrome P450 CYP3A4, CYP1A2 nor p-glycoprotein function were present in the co-medication.
- *Clinical course:* A good hematologic tolerance allowed increasing the dosage of pomalidomide up to 4 mg q.d. from the subsequent cycle onwards. The patient showed a moderately satisfactory response to this treatment combination, with pre-dialytic light chain levels decreasing from 3500 mg/L to 2000 mg/L (i.e. - 43%) after the first cycle. The treatment was therefore pursued, and further decreased light chains to the currently observed level of 283 mg/L after the 8<sup>th</sup> cycle. However, kidney function did not recover and the patient still requires intermittent dialysis.

### *Methods:*

- *Blood sampling schedule:* Samples were taken from days 1 to 7 of the first cycle of treatment. Blood samples were taken 5 hours post-dose, at the beginning, 3 hours after the beginning and at the end of 4 consecutive dialysis sessions. Post-filter and dialysate

samples were also drawn 3 hours after starting each dialysis session.

*Model development:*

A pharmacokinetic model was used to predict plasma concentrations of pomalidomide during HCO dialysis, based on published pomalidomide pharmacokinetic parameters, patient's renal and hepatic status on admission and dialysis settings. An *a priori* pharmacokinetic model was built up initially without taking into account our observations, and then compared to the observed plasma concentrations, to check whether they were consistent with the model.

Two-compartment kinetics best describe pomalidomide disposition according to the literature.<sup>1</sup> Pomalidomide normal total clearance ( $CL_{Tot,N}$ ), hepatic extraction ratio ( $E_H$ ), central volume of distribution ( $V_c$ ), peripheral volume of distribution ( $V_p$ ), intercompartmental clearance between central and peripheral compartments ( $Q$ ), absorption lag time ( $A_{lag}$ ), unbound fraction ( $f_u$ ) and absorption rate constant ( $k_a$ ) were obtained from the literature<sup>1-3</sup>, as follows:  $CL_{Tot,N} = 9.16$  L/h,  $E_H = 0.978$ ,  $V_c = 59.4$  L (according to equation 5 below),  $V_p = 71.5$  L,  $Q = 3.75$  L/h,  $A_{lag} = 0.385$  h,  $f_u = 0.71$ ,  $k_a = 1.25$  h<sup>-1</sup>. Note that  $CL_{Tot,N}$ ,  $V_c$ ,  $V_p$ ,  $Q$  are apparent values, incorporating bioavailability.

The patient's pomalidomide non-renal clearance ( $CL_{NR}$ , L/h) and renal clearance ( $CL_R$ , L/h) were calculated as:

$$CL_{NR} = CL_{Tot,N} \cdot E_H \quad (1)$$

$$CL_R = CL_{Tot,N} \cdot (1 - E_H) \cdot \frac{GFR_{patient}}{6} \quad (2)$$

Where  $GFR_{patient}$  is 0.6 L/h (i.e 10 mL/min) divided by 6 L/h corresponding to a normal GFR.

Pomalidomide dialytic clearance ( $CL_{Dial}$ , L/h) was estimated based on blood flow ( $Q_{Blood}$ ), unbound fraction ( $f_u$ ) and blood/plasma concentration ratio ( $r_{bp}$ ).

$$CL_{Dial} = Q_{Blood} \cdot f_u \cdot r_{bp} \quad (3)$$

The  $r_{bp}$  was taken as 1 minus the hematocrit, i.e. 0.73 in this patient, in line with the value of 0.75 – 0.90 already published.<sup>2</sup>

The patient's pomalidomide total clearance  $CL_{Tot,patient}$  (L/h) was equated to the sum of renal clearance ( $CL_R$ ), non-renal clearance ( $CL_{NR}$ ) and dialytic clearance ( $CL_{Dial}$ ):

$$CL_{Tot,patient} = CL_R + CL_{NR} + CL_{Dial} \quad (4)$$

Central volume of distribution ( $V_c$ ) was calculated as:

$$V_c = 58.3 \cdot \left( \left( \frac{\text{Body Weight}}{78.3} \right)^{0.686} \right) \cdot \left( 1 + 0.00609 \cdot (\text{Total proteins} - 73.0) \right) \quad (5)$$

giving 59.4 L with a body weight of 84.9 kg and a value of total proteins of 67 g/L.

The amount of pomalidomide ( $\mu\text{g}$ ) in the central ( $A_c$ ) and peripheral ( $A_p$ ) compartments were calculated over time according to the following differential equations:

$$\frac{dA_c}{dt} = k_a \cdot A_a - \frac{CL_{Tot,Patient}}{V_c} \cdot A_c - \frac{Q}{V_c} \cdot A_c + \frac{Q}{V_p} \cdot A_p \quad (6)$$

$$\frac{dA_p}{dt} = \frac{Q}{V_c} \cdot A_c - \frac{Q}{V_p} \cdot A_p \quad \text{with } A_c = 0 \text{ and } A_p = 0 \text{ at } t = 0 \quad (7)$$

Where  $A_a$  is the amount of pomalidomide in the absorption site, evolving over time according to:

$$\frac{dA_a}{dt} = -k_a \cdot A_a \quad \text{with } A_a = \text{dose } (\mu\text{g}) \text{ at } t = 0 \quad (8)$$

The predicted concentration  $C_c$  ( $\mu\text{g/L}$ ) of pomalidomide in the central compartment was calculated as:

$$C_c = \frac{A_c}{V_c} \quad (9)$$

The area under the curve (AUC) was eventually calculated by numerical integration over 24 hours as:

$$AUC = \int_0^{24h} C_c \cdot dt \quad (10)$$

Mean AUC<sub>24h</sub> values were calculated over one week, either with HCO dialysis 4 times a week (on-dialysis) or without any HCO dialysis (off-dialysis).

Pomalidomide extraction coefficient (E) was calculated from pre-filter (C<sub>a</sub>) and post-filter (C<sub>v</sub>) concentrations measured during HCO dialysis:

$$E (\%) = \frac{(C_a - C_v)}{C_a} \cdot 100 \quad (11)$$

Half-life (t<sub>1/2</sub>) is calculated as:

$$t_{1/2, \text{ on-dialysis}} = \ln(2) \cdot \frac{V_{ss}/F}{CL_{Tot,patient} + CL_{Dial}} \quad (12)$$

$$t_{1/2, \text{ off-dialysis}} = \ln(2) \cdot \frac{V_{ss}/F}{CL_{Tot,patient}} \quad (13)$$

The predictions based on this model were compared to the observed concentrations. The model was implemented and optimized using Microsoft Excel 2007 (Microsoft Corp., Redmond, WA) with the Solver™ add-on. It could be further refined by revising CL<sub>Tot, Patient</sub> to 3 L/h, V<sub>c</sub> to 63 L, V<sub>p</sub> to 69 L, Q to 1.44 L/h, k<sub>a</sub> to 0.82 h<sup>-1</sup>, in order to improve the model fit and to obtain the most likely description of pomalidomide concentrations between and during HCO dialysis sessions (Fig. 1). The estimated AUC<sub>24h</sub> amounted to 475 µg·h/L for a dosage of 2 mg q.d. The mean AUC<sub>24h</sub> off-dialysis was estimated to 574 µg·h/L for the same dosage. Pomalidomide dialytic extraction ratio was estimated as 38%, 37%, 65% and 38% during the first, second, third and fourth dialyses respectively. These values are consistent with our initial estimation of the f<sub>u</sub> · r<sub>bp</sub> (51%).

#### Works Cited:

1. Li Y, Xu Y, Liu L, Wang X, Palmisano M, Zhou S. Population pharmacokinetics of pomalidomide. *Journal of clinical pharmacology*. 2015;55(5):563-572.
2. Hoffmann M, Kasserra C, Reyes J, et al. Absorption, metabolism and excretion of [14C]pomalidomide in humans following oral administration. *Cancer chemotherapy and*

- pharmacology*. 2013;71(2):489-501.
3. Pomalyst (pomalidomide) capsule, label information. Labeling revision, updated on 06/30/2016. [http://www.accessdata.fda.gov/drugsatfda\\_docs/label/2016/204026s012s014lbl.pdf](http://www.accessdata.fda.gov/drugsatfda_docs/label/2016/204026s012s014lbl.pdf). Accessed July 14, 2016.
